# Supplementary material for: Pragmatic MDR: a metadata repository with bottom-up standardization of medical metadata through reuse
Source: PubMed Central journal article supplement (PMC8130274; doi:10.1186/s12911-021-01524-8), 2021-05-17
Supplement: 12911_2021_1524_MOESM1_ESM.pdf [file 12911_2021_1524_MOESM1_ESM.pdf]

# Item Quality Evaluation

## Overview Item Evaluation Criteria

The question text of each item definition should be the main identifier for its semantics. Hence, the question text determines which data an item shall collect. As a consequence, the question cannot be evaluated for its semantic correctness, but only whether it matches formal requirements as clear wording or correct spelling. All other elements of the item definition must be evaluated for their correctness in regard to the item semantics, i.e. if the options offered by the Codelist do not make sense for the item Question, the Codelist should be rated low.

**Question:** Is the question a suitable label shown to a human user when prompted to provide data for this item on paper or on a screen?

**Codelist:** Is the discrete set of permitted values with the print /display-forms and actual values sensible for the item definition?

**Name:** Is the name a proper human readable identifier for the item entity?

**DataType:** Is the data type general enough to represent the collected data and is it the most restrictive one that still specifies the data correctly?

**Length** (*required for text/string, optional for integer/float*): Is the length in combination with the data type and range checks sensible for the collected data?

**Description:** Is the description a meaningful free-text description of the item component?

**Alias:** Do the alias elements contain a suitable semantic coding for the medical concept of the item?

**RangeChecks:** Are the range checks in combination with the data type and length sensible for the collected data?

**Good match:** Is the item definition a reasonable result for the search query?

**Relevancy:** Is the item definition relevant?

## Overview Item data type definitions

| Format Name        | Schema Datatype | Allowed String Pattern                                                                                          |
|--------------------|-----------------|-----------------------------------------------------------------------------------------------------------------|
| integer            | xs:integer      | -?digit+                                                                                                        |
| float              | xs:decimal      | -?digit+(.digit+)?                                                                                              |
| date               | xs:date         | YYYY-MM-DD                                                                                                      |
| time               | xs:time         | hh:mm:ss(.n+)? (((+ -)hh:mm) Z)?                                                                                |
| datetime           | xs:dateTime     | YYYY-MM-DDThh:mm:ss(.n+)?(((+ -)hh:mm) Z)?                                                                      |
| text               | xs:string       | <i>any sequence of characters</i>                                                                               |
| string             | xs:string       | Semantically equivalent to <b>text</b> but directly supported as XML Schema datatype                            |
| boolean            | xs:boolean      | (true   false   1   0)                                                                                          |
| double             | xs:string       | ((\+ -)?[0-9]+(\.[0-9]+)?((D d E e)(\+ -)[0-9]+)?)(-?INF) (NaN))                                                |
| hexBinary          | xs:hexBinary    | hex-encoded binary stream data                                                                                  |
| base64Binary       | xs:base64Binary | binary stream encoded using Base64 Alphabet                                                                     |
| hexFloat           | xs:hexBinary    | up to 16 characters                                                                                             |
| base64Float        | xs:base64Binary | up to 12 characters                                                                                             |
| partialDate        | xs:date         | [YYYY[-MM[-DD ]]]                                                                                               |
| partialTime        | xs:time         | [hh[:mm[:ss(.n+)? (((+ -)hh:mm) Z)?]]]                                                                          |
| partialDatetime    | xs:dateTime     | [YYYY[-MM[-DD[T hh[:mm[:ss(.n+)? ((+ -)hh:mm)?]]]]]]                                                            |
| intervalDatetime   | xs:string       | partialDatetime/partialDatetime <br>(durationDatetime/partialDatetime) <br>(partialDatetime/durationDatetime)   |
| durationDatetime   | xs:duration     | ((+ -)?P(((n(n+)?Y)?((nn+)?M)?((nn+)?D)?<br>(T(((n(n+)?H)?((n(n+)?M)?((n(n+)?(\.n+)?S)?)?)?<br>(((n(n+)?W)))))) |
| incompleteDatetime | xs:string       | [YYYY -]-[MM -]-[DD -]]T[hh -]:[mm -]:[ss.s -][? (+ -)nn:nn Z]                                                  |
| incompleteDate     | xs:string       | [YYYY -]-[MM -]-[DD -]                                                                                          |
| incompleteTime     | xs:string       | T[hh -]:[mm -]:[ss.s -][?(+ -)nn:nn Z]                                                                          |
| URI                | xs:anyURI       |                                                                                                                 |

# Item 1/24: "Body Height"

## Candidate 1/3

**Body height** \_\_\_\_\_ cm

**Name:** Height  
**DataType:** float  
**Length:** 255  
**Description:**  
**Alias:** Body Height  
**RangeChecks:**

|             | Strongly disagree (1) | Disagree (2) | Neither agree nor disagree (3) | Agree (4) | Strongly agree (5) |
|-------------|-----------------------|--------------|--------------------------------|-----------|--------------------|
| Question    |                       |              |                                |           |                    |
| Codelist    |                       |              |                                |           |                    |
| Name        |                       |              |                                |           |                    |
| DataType    |                       |              |                                |           |                    |
| Length      |                       |              |                                |           |                    |
| Description |                       |              |                                |           |                    |
| Alias       |                       |              |                                |           |                    |
| RangeChecks |                       |              |                                |           |                    |
| Good match  |                       |              |                                |           |                    |
| Relevancy   |                       |              |                                |           |                    |

## Candidate 2/3

**Body Height** \_\_\_\_\_ cm

**Name:** Body Height  
**DataType:** integer  
**Length:** 7  
**Description:**  
**Alias:** Body Height  
**RangeChecks:**

|             | Strongly disagree (1) | Disagree (2) | Neither agree nor disagree (3) | Agree (4) | Strongly agree (5) |
|-------------|-----------------------|--------------|--------------------------------|-----------|--------------------|
| Question    |                       |              |                                |           |                    |
| Codelist    |                       |              |                                |           |                    |
| Name        |                       |              |                                |           |                    |
| DataType    |                       |              |                                |           |                    |
| Length      |                       |              |                                |           |                    |
| Description |                       |              |                                |           |                    |
| Alias       |                       |              |                                |           |                    |
| RangeChecks |                       |              |                                |           |                    |
| Good match  |                       |              |                                |           |                    |
| Relevancy   |                       |              |                                |           |                    |

## Candidate 3/3

**Body Height** \_\_\_\_\_ cm

**Name:** Body Height  
**DataType:** integer  
**Length:**  
**Description:**  
**Alias:** Body Height  
**RangeChecks:**

|             | Strongly disagree (1) | Disagree (2) | Neither agree nor disagree (3) | Agree (4) | Strongly agree (5) |
|-------------|-----------------------|--------------|--------------------------------|-----------|--------------------|
| Question    |                       |              |                                |           |                    |
| Codelist    |                       |              |                                |           |                    |
| Name        |                       |              |                                |           |                    |
| DataType    |                       |              |                                |           |                    |
| Length      |                       |              |                                |           |                    |
| Description |                       |              |                                |           |                    |
| Alias       |                       |              |                                |           |                    |
| RangeChecks |                       |              |                                |           |                    |
| Good match  |                       |              |                                |           |                    |
| Relevancy   |                       |              |                                |           |                    |

## Item 2/24: "Body Weight"

Candidate 1/3

|                                           |
|-------------------------------------------|
| <p><b>Body weight</b></p> <p>_____ kg</p> |
|-------------------------------------------|

**Name:** Weight  
**DataType:** float  
**Length:** 255  
**Description:**  
**Alias:** Body Weight  
**RangeChecks:**

|             | Strongly disagree (1) | Disagree (2) | Neither agree nor disagree (3) | Agree (4) | Strongly agree (5) |
|-------------|-----------------------|--------------|--------------------------------|-----------|--------------------|
| Question    |                       |              |                                |           |                    |
| Codelist    |                       |              |                                |           |                    |
| Name        |                       |              |                                |           |                    |
| DataType    |                       |              |                                |           |                    |
| Length      |                       |              |                                |           |                    |
| Description |                       |              |                                |           |                    |
| Alias       |                       |              |                                |           |                    |
| RangeChecks |                       |              |                                |           |                    |
| Good match  |                       |              |                                |           |                    |
| Relevancy   |                       |              |                                |           |                    |

Candidate 2/3

|                                           |
|-------------------------------------------|
| <p><b>Body weight</b></p> <p>_____ kg</p> |
|-------------------------------------------|

**Name:** Weight  
**DataType:** float  
**Length:** 3  
**Description:** Body weight  
**Alias:** Body Weight  
**RangeChecks:** >= 0

|             | Strongly disagree (1) | Disagree (2) | Neither agree nor disagree (3) | Agree (4) | Strongly agree (5) |
|-------------|-----------------------|--------------|--------------------------------|-----------|--------------------|
| Question    |                       |              |                                |           |                    |
| Codelist    |                       |              |                                |           |                    |
| Name        |                       |              |                                |           |                    |
| DataType    |                       |              |                                |           |                    |
| Length      |                       |              |                                |           |                    |
| Description |                       |              |                                |           |                    |
| Alias       |                       |              |                                |           |                    |
| RangeChecks |                       |              |                                |           |                    |
| Good match  |                       |              |                                |           |                    |
| Relevancy   |                       |              |                                |           |                    |

Candidate 3/3

|                                           |
|-------------------------------------------|
| <p><b>Body weight</b></p> <p>_____ kg</p> |
|-------------------------------------------|

**Name:** Body weight  
**DataType:** float  
**Length:** 10  
**Description:**  
**Alias:** Body Weight  
**RangeChecks:**

|             | Strongly disagree (1) | Disagree (2) | Neither agree nor disagree (3) | Agree (4) | Strongly agree (5) |
|-------------|-----------------------|--------------|--------------------------------|-----------|--------------------|
| Question    |                       |              |                                |           |                    |
| Codelist    |                       |              |                                |           |                    |
| Name        |                       |              |                                |           |                    |
| DataType    |                       |              |                                |           |                    |
| Length      |                       |              |                                |           |                    |
| Description |                       |              |                                |           |                    |
| Alias       |                       |              |                                |           |                    |
| RangeChecks |                       |              |                                |           |                    |
| Good match  |                       |              |                                |           |                    |
| Relevancy   |                       |              |                                |           |                    |

# Item 3/24: "Diastolic BP"

## Candidate 1/3

**BP:** \_\_\_\_\_ mmHg

**Name:** diastolic blood pressure  
**DataType:** integer  
**Length:** 255  
**Description:** diastolic  
**Alias:** Diastolic blood pressure  
**RangeChecks:**

|             | Strongly disagree (1) | Disagree (2) | Neither agree nor disagree (3) | Agree (4) | Strongly agree (5) |
|-------------|-----------------------|--------------|--------------------------------|-----------|--------------------|
| Question    |                       |              |                                |           |                    |
| Codelist    |                       |              |                                |           |                    |
| Name        |                       |              |                                |           |                    |
| DataType    |                       |              |                                |           |                    |
| Length      |                       |              |                                |           |                    |
| Description |                       |              |                                |           |                    |
| Alias       |                       |              |                                |           |                    |
| RangeChecks |                       |              |                                |           |                    |
| Good match  |                       |              |                                |           |                    |
| Relevancy   |                       |              |                                |           |                    |

## Candidate 2/3

**Semi-supine BP Diastolic**

\_\_\_\_\_

**Name:** diastolic pressure  
**DataType:** text  
**Length:** 255  
**Description:**  
**Alias:** Diastolic blood pressure  
**RangeChecks:**

|             | Strongly disagree (1) | Disagree (2) | Neither agree nor disagree (3) | Agree (4) | Strongly agree (5) |
|-------------|-----------------------|--------------|--------------------------------|-----------|--------------------|
| Question    |                       |              |                                |           |                    |
| Codelist    |                       |              |                                |           |                    |
| Name        |                       |              |                                |           |                    |
| DataType    |                       |              |                                |           |                    |
| Length      |                       |              |                                |           |                    |
| Description |                       |              |                                |           |                    |
| Alias       |                       |              |                                |           |                    |
| RangeChecks |                       |              |                                |           |                    |
| Good match  |                       |              |                                |           |                    |
| Relevancy   |                       |              |                                |           |                    |

## Candidate 3/3

**Standing BP Diastolic**

\_\_\_\_\_

**Name:** diastolic pressure standing  
**DataType:** text  
**Length:** 255  
**Description:**  
**Alias:** Diastolic blood pressure, Standing position  
**RangeChecks:**

|             | Strongly disagree (1) | Disagree (2) | Neither agree nor disagree (3) | Agree (4) | Strongly agree (5) |
|-------------|-----------------------|--------------|--------------------------------|-----------|--------------------|
| Question    |                       |              |                                |           |                    |
| Codelist    |                       |              |                                |           |                    |
| Name        |                       |              |                                |           |                    |
| DataType    |                       |              |                                |           |                    |
| Length      |                       |              |                                |           |                    |
| Description |                       |              |                                |           |                    |
| Alias       |                       |              |                                |           |                    |
| RangeChecks |                       |              |                                |           |                    |
| Good match  |                       |              |                                |           |                    |
| Relevancy   |                       |              |                                |           |                    |

## Item 4/24: "Systolic BP"

### Candidate 1/3

|                                     |
|-------------------------------------|
| <p><b>BP:</b></p> <p>_____ mmHg</p> |
|-------------------------------------|

**Name:** systolic blood pressure  
**DataType:** integer  
**Length:** 255  
**Description:** systolic  
**Alias:** Systolic Pressure  
**RangeChecks:**

|             | Strongly disagree (1) | Disagree (2) | Neither agree nor disagree (3) | Agree (4) | Strongly agree (5) |
|-------------|-----------------------|--------------|--------------------------------|-----------|--------------------|
| Question    |                       |              |                                |           |                    |
| Codelist    |                       |              |                                |           |                    |
| Name        |                       |              |                                |           |                    |
| DataType    |                       |              |                                |           |                    |
| Length      |                       |              |                                |           |                    |
| Description |                       |              |                                |           |                    |
| Alias       |                       |              |                                |           |                    |
| RangeChecks |                       |              |                                |           |                    |
| Good match  |                       |              |                                |           |                    |
| Relevancy   |                       |              |                                |           |                    |

### Candidate 2/3

|                                             |
|---------------------------------------------|
| <p><b>Systolic BP</b></p> <p>_____ mmHg</p> |
|---------------------------------------------|

**Name:** Systolic Blood Pressure  
**DataType:** integer  
**Length:**  
**Description:** Systolic BP  
**Alias:** Systolic Pressure  
**RangeChecks:**

|             | Strongly disagree (1) | Disagree (2) | Neither agree nor disagree (3) | Agree (4) | Strongly agree (5) |
|-------------|-----------------------|--------------|--------------------------------|-----------|--------------------|
| Question    |                       |              |                                |           |                    |
| Codelist    |                       |              |                                |           |                    |
| Name        |                       |              |                                |           |                    |
| DataType    |                       |              |                                |           |                    |
| Length      |                       |              |                                |           |                    |
| Description |                       |              |                                |           |                    |
| Alias       |                       |              |                                |           |                    |
| RangeChecks |                       |              |                                |           |                    |
| Good match  |                       |              |                                |           |                    |
| Relevancy   |                       |              |                                |           |                    |

### Candidate 3/3

|                                                    |
|----------------------------------------------------|
| <p><b>Semi-supine BP Systolic</b></p> <p>_____</p> |
|----------------------------------------------------|

**Name:** systolic pressure  
**DataType:** text  
**Length:** 255  
**Description:**  
**Alias:** Systolic Pressure  
**RangeChecks:**

|             | Strongly disagree (1) | Disagree (2) | Neither agree nor disagree (3) | Agree (4) | Strongly agree (5) |
|-------------|-----------------------|--------------|--------------------------------|-----------|--------------------|
| Question    |                       |              |                                |           |                    |
| Codelist    |                       |              |                                |           |                    |
| Name        |                       |              |                                |           |                    |
| DataType    |                       |              |                                |           |                    |
| Length      |                       |              |                                |           |                    |
| Description |                       |              |                                |           |                    |
| Alias       |                       |              |                                |           |                    |
| RangeChecks |                       |              |                                |           |                    |
| Good match  |                       |              |                                |           |                    |
| Relevancy   |                       |              |                                |           |                    |

## Item 5/24: "Pulse"

### Candidate 1/3

|                                                                                                           |
|-----------------------------------------------------------------------------------------------------------|
| <p><b>Pulse (bpm)</b></p> <hr style="width: 80%; margin-left: 0;"/> <p style="text-align: right;">bpm</p> |
|-----------------------------------------------------------------------------------------------------------|

**Name:** Pulse  
**DataType:** integer  
**Length:** 255  
**Description:**  
**Alias:** Pulse Rate  
**RangeChecks:**

|             | Strongly disagree (1) | Disagree (2) | Neither agree nor disagree (3) | Agree (4) | Strongly agree (5) |
|-------------|-----------------------|--------------|--------------------------------|-----------|--------------------|
| Question    |                       |              |                                |           |                    |
| Codelist    |                       |              |                                |           |                    |
| Name        |                       |              |                                |           |                    |
| DataType    |                       |              |                                |           |                    |
| Length      |                       |              |                                |           |                    |
| Description |                       |              |                                |           |                    |
| Alias       |                       |              |                                |           |                    |
| RangeChecks |                       |              |                                |           |                    |
| Good match  |                       |              |                                |           |                    |
| Relevancy   |                       |              |                                |           |                    |

### Candidate 2/3

|                                                               |
|---------------------------------------------------------------|
| <p><b>Pulse</b></p> <hr style="width: 80%; margin-left: 0;"/> |
|---------------------------------------------------------------|

**Name:** Pulse  
**DataType:** text  
**Length:** 255  
**Description:**  
**Alias:** Pulse Rate  
**RangeChecks:**

|             | Strongly disagree (1) | Disagree (2) | Neither agree nor disagree (3) | Agree (4) | Strongly agree (5) |
|-------------|-----------------------|--------------|--------------------------------|-----------|--------------------|
| Question    |                       |              |                                |           |                    |
| Codelist    |                       |              |                                |           |                    |
| Name        |                       |              |                                |           |                    |
| DataType    |                       |              |                                |           |                    |
| Length      |                       |              |                                |           |                    |
| Description |                       |              |                                |           |                    |
| Alias       |                       |              |                                |           |                    |
| RangeChecks |                       |              |                                |           |                    |
| Good match  |                       |              |                                |           |                    |
| Relevancy   |                       |              |                                |           |                    |

### Candidate 3/3

|                                                                                                          |
|----------------------------------------------------------------------------------------------------------|
| <p><b>Pulse</b></p> <hr style="width: 80%; margin-left: 0;"/> <p style="text-align: right;">beats...</p> |
|----------------------------------------------------------------------------------------------------------|

**Name:** Pulse Rate  
**DataType:** integer  
**Length:** 255  
**Description:** Post-Dose Reading 1: after 10 min in semi-supine position. 2 hours post-dose.  
**Alias:** Pulse Rate  
**RangeChecks:**

|             | Strongly disagree (1) | Disagree (2) | Neither agree nor disagree (3) | Agree (4) | Strongly agree (5) |
|-------------|-----------------------|--------------|--------------------------------|-----------|--------------------|
| Question    |                       |              |                                |           |                    |
| Codelist    |                       |              |                                |           |                    |
| Name        |                       |              |                                |           |                    |
| DataType    |                       |              |                                |           |                    |
| Length      |                       |              |                                |           |                    |
| Description |                       |              |                                |           |                    |
| Alias       |                       |              |                                |           |                    |
| RangeChecks |                       |              |                                |           |                    |
| Good match  |                       |              |                                |           |                    |
| Relevancy   |                       |              |                                |           |                    |

# Item 6/24: "Body Temperature"

## Candidate 1/3

**Body temperature** \_\_\_\_\_ °C

**Name:** Body temperature  
**DataType:** float  
**Length:** 255  
**Description:** Sub-Itemgroup: Vital Signs  
**Alias:** Body Temperature  
**RangeChecks:**

|             | Strongly disagree (1) | Disagree (2) | Neither agree nor disagree (3) | Agree (4) | Strongly agree (5) |
|-------------|-----------------------|--------------|--------------------------------|-----------|--------------------|
| Question    |                       |              |                                |           |                    |
| Codelist    |                       |              |                                |           |                    |
| Name        |                       |              |                                |           |                    |
| DataType    |                       |              |                                |           |                    |
| Length      |                       |              |                                |           |                    |
| Description |                       |              |                                |           |                    |
| Alias       |                       |              |                                |           |                    |
| RangeChecks |                       |              |                                |           |                    |
| Good match  |                       |              |                                |           |                    |
| Relevancy   |                       |              |                                |           |                    |

## Candidate 2/3

**Body Temperature** \_\_\_\_\_ °C

**Name:** Body Temperature  
**DataType:** float  
**Length:**  
**Description:**  
**Alias:** Body Temperature  
**RangeChecks:**

|             | Strongly disagree (1) | Disagree (2) | Neither agree nor disagree (3) | Agree (4) | Strongly agree (5) |
|-------------|-----------------------|--------------|--------------------------------|-----------|--------------------|
| Question    |                       |              |                                |           |                    |
| Codelist    |                       |              |                                |           |                    |
| Name        |                       |              |                                |           |                    |
| DataType    |                       |              |                                |           |                    |
| Length      |                       |              |                                |           |                    |
| Description |                       |              |                                |           |                    |
| Alias       |                       |              |                                |           |                    |
| RangeChecks |                       |              |                                |           |                    |
| Good match  |                       |              |                                |           |                    |
| Relevancy   |                       |              |                                |           |                    |

## Candidate 3/3

**Body Temperature** \_\_\_\_\_ °C

**Name:** Body Temperature  
**DataType:** float  
**Length:** 255  
**Description:**  
**Alias:** Body Temperature  
**RangeChecks:**

|             | Strongly disagree (1) | Disagree (2) | Neither agree nor disagree (3) | Agree (4) | Strongly agree (5) |
|-------------|-----------------------|--------------|--------------------------------|-----------|--------------------|
| Question    |                       |              |                                |           |                    |
| Codelist    |                       |              |                                |           |                    |
| Name        |                       |              |                                |           |                    |
| DataType    |                       |              |                                |           |                    |
| Length      |                       |              |                                |           |                    |
| Description |                       |              |                                |           |                    |
| Alias       |                       |              |                                |           |                    |
| RangeChecks |                       |              |                                |           |                    |
| Good match  |                       |              |                                |           |                    |
| Relevancy   |                       |              |                                |           |                    |

# Item 7/24: "Creatinine"

Candidate 1/3

|                                             |
|---------------------------------------------|
| <p><b>Creatinine</b></p> <p>_____ mg/dL</p> |
|---------------------------------------------|

**Name:** Creatinine, Serum  
**DataType:** float  
**Length:** 5  
**Description:** Creatinine  
**Alias:** Creatinine measurement, serum (procedure)  
**RangeChecks:**

|                    | Strongly disagree (1) | Disagree (2) | Neither agree nor disagree (3) | Agree (4) | Strongly agree (5) |
|--------------------|-----------------------|--------------|--------------------------------|-----------|--------------------|
| Question           |                       |              |                                |           |                    |
| <b>Codelist</b>    |                       |              |                                |           |                    |
| Name               |                       |              |                                |           |                    |
| DataType           |                       |              |                                |           |                    |
| Length             |                       |              |                                |           |                    |
| Description        |                       |              |                                |           |                    |
| Alias              |                       |              |                                |           |                    |
| <b>RangeChecks</b> |                       |              |                                |           |                    |
| Good match         |                       |              |                                |           |                    |
| Relevancy          |                       |              |                                |           |                    |

Candidate 2/3

|                                       |
|---------------------------------------|
| <p><b>Creatinine</b></p> <p>_____</p> |
|---------------------------------------|

**Name:** Creatinine  
**DataType:** float  
**Length:** 255  
**Description:**  
**Alias:** Creatinine measurement, serum (procedure)  
**RangeChecks:**

|                    | Strongly disagree (1) | Disagree (2) | Neither agree nor disagree (3) | Agree (4) | Strongly agree (5) |
|--------------------|-----------------------|--------------|--------------------------------|-----------|--------------------|
| Question           |                       |              |                                |           |                    |
| <b>Codelist</b>    |                       |              |                                |           |                    |
| Name               |                       |              |                                |           |                    |
| DataType           |                       |              |                                |           |                    |
| Length             |                       |              |                                |           |                    |
| <b>Description</b> |                       |              |                                |           |                    |
| Alias              |                       |              |                                |           |                    |
| <b>RangeChecks</b> |                       |              |                                |           |                    |
| Good match         |                       |              |                                |           |                    |
| Relevancy          |                       |              |                                |           |                    |

Candidate 3/3

|                                                        |
|--------------------------------------------------------|
| <p><b>Creatinine Clearance</b></p> <p>_____ mL/min</p> |
|--------------------------------------------------------|

**Name:** Creatinine Clearance  
**DataType:** float  
**Length:** 7  
**Description:** Creatinine Clearance  
**Alias:** Creatinine clearance measurement  
**RangeChecks:**

|                    | Strongly disagree (1) | Disagree (2) | Neither agree nor disagree (3) | Agree (4) | Strongly agree (5) |
|--------------------|-----------------------|--------------|--------------------------------|-----------|--------------------|
| Question           |                       |              |                                |           |                    |
| <b>Codelist</b>    |                       |              |                                |           |                    |
| Name               |                       |              |                                |           |                    |
| DataType           |                       |              |                                |           |                    |
| Length             |                       |              |                                |           |                    |
| Description        |                       |              |                                |           |                    |
| Alias              |                       |              |                                |           |                    |
| <b>RangeChecks</b> |                       |              |                                |           |                    |
| Good match         |                       |              |                                |           |                    |
| Relevancy          |                       |              |                                |           |                    |

## Item 8/24: "Hemoglobin"

Candidate 1/3

|                                                                                                        |
|--------------------------------------------------------------------------------------------------------|
| <b>Hemoglobin</b><br><hr style="width: 80%; margin-left: 0;"/> <span style="float: right;">g/dL</span> |
|--------------------------------------------------------------------------------------------------------|

**Name:** Hemoglobin  
**DataType:** float  
**Length:** 10  
**Description:**  
**Alias:** Hemoglobin  
**RangeChecks:**

|             | Strongly disagree (1) | Disagree (2) | Neither agree nor disagree (3) | Agree (4) | Strongly agree (5) |
|-------------|-----------------------|--------------|--------------------------------|-----------|--------------------|
| Question    |                       |              |                                |           |                    |
| Codelist    |                       |              |                                |           |                    |
| Name        |                       |              |                                |           |                    |
| DataType    |                       |              |                                |           |                    |
| Length      |                       |              |                                |           |                    |
| Description |                       |              |                                |           |                    |
| Alias       |                       |              |                                |           |                    |
| RangeChecks |                       |              |                                |           |                    |
| Good match  |                       |              |                                |           |                    |
| Relevancy   |                       |              |                                |           |                    |

Candidate 2/3

|                                                                                                        |
|--------------------------------------------------------------------------------------------------------|
| <b>Hemoglobin</b><br><hr style="width: 80%; margin-left: 0;"/> <span style="float: right;">g/dL</span> |
|--------------------------------------------------------------------------------------------------------|

**Name:** Hemoglobin  
**DataType:** float  
**Length:** 5  
**Description:** Hemoglobin  
**Alias:** Hemoglobin  
**RangeChecks:**

|             | Strongly disagree (1) | Disagree (2) | Neither agree nor disagree (3) | Agree (4) | Strongly agree (5) |
|-------------|-----------------------|--------------|--------------------------------|-----------|--------------------|
| Question    |                       |              |                                |           |                    |
| Codelist    |                       |              |                                |           |                    |
| Name        |                       |              |                                |           |                    |
| DataType    |                       |              |                                |           |                    |
| Length      |                       |              |                                |           |                    |
| Description |                       |              |                                |           |                    |
| Alias       |                       |              |                                |           |                    |
| RangeChecks |                       |              |                                |           |                    |
| Good match  |                       |              |                                |           |                    |
| Relevancy   |                       |              |                                |           |                    |

Candidate 3/3

|                                                                                                        |
|--------------------------------------------------------------------------------------------------------|
| <b>Hemoglobin</b><br><hr style="width: 80%; margin-left: 0;"/> <span style="float: right;">g/dL</span> |
|--------------------------------------------------------------------------------------------------------|

**Name:** LaboratoryProcedureHemoglobinResultSpecifiedValue  
**DataType:** float  
**Length:** 5  
**Description:**  
**Alias:**  
**RangeChecks:**

|             | Strongly disagree (1) | Disagree (2) | Neither agree nor disagree (3) | Agree (4) | Strongly agree (5) |
|-------------|-----------------------|--------------|--------------------------------|-----------|--------------------|
| Question    |                       |              |                                |           |                    |
| Codelist    |                       |              |                                |           |                    |
| Name        |                       |              |                                |           |                    |
| DataType    |                       |              |                                |           |                    |
| Length      |                       |              |                                |           |                    |
| Description |                       |              |                                |           |                    |
| Alias       |                       |              |                                |           |                    |
| RangeChecks |                       |              |                                |           |                    |
| Good match  |                       |              |                                |           |                    |
| Relevancy   |                       |              |                                |           |                    |



## Item 10/24: "Glucose"

Candidate 1/3

|                                          |
|------------------------------------------|
| <p><b>Glucose</b></p> <p>_____ mg/dl</p> |
|------------------------------------------|

**Name:** Glucose  
**DataType:** float  
**Length:** 10  
**Description:**  
**Alias:** Plasma Glucose Measurement  
**RangeChecks:**

|             | Strongly disagree (1) | Disagree (2) | Neither agree nor disagree (3) | Agree (4) | Strongly agree (5) |
|-------------|-----------------------|--------------|--------------------------------|-----------|--------------------|
| Question    |                       |              |                                |           |                    |
| Codelist    |                       |              |                                |           |                    |
| Name        |                       |              |                                |           |                    |
| DataType    |                       |              |                                |           |                    |
| Length      |                       |              |                                |           |                    |
| Description |                       |              |                                |           |                    |
| Alias       |                       |              |                                |           |                    |
| RangeChecks |                       |              |                                |           |                    |
| Good match  |                       |              |                                |           |                    |
| Relevancy   |                       |              |                                |           |                    |

Candidate 2/3

|                                           |
|-------------------------------------------|
| <p><b>Glucose</b></p> <p>_____ mmol/L</p> |
|-------------------------------------------|

**Name:** Blood Glucose  
**DataType:** float  
**Length:** 255  
**Description:**  
**Alias:** Plasma Glucose Measurement  
**RangeChecks:**

|             | Strongly disagree (1) | Disagree (2) | Neither agree nor disagree (3) | Agree (4) | Strongly agree (5) |
|-------------|-----------------------|--------------|--------------------------------|-----------|--------------------|
| Question    |                       |              |                                |           |                    |
| Codelist    |                       |              |                                |           |                    |
| Name        |                       |              |                                |           |                    |
| DataType    |                       |              |                                |           |                    |
| Length      |                       |              |                                |           |                    |
| Description |                       |              |                                |           |                    |
| Alias       |                       |              |                                |           |                    |
| RangeChecks |                       |              |                                |           |                    |
| Good match  |                       |              |                                |           |                    |
| Relevancy   |                       |              |                                |           |                    |

Candidate 3/3

|                                                                                                                                                                        |
|------------------------------------------------------------------------------------------------------------------------------------------------------------------------|
| <p><b>Glucose</b></p> <p><input type="checkbox"/> normal (0)</p> <p><input type="checkbox"/> out of range NCS (1)</p> <p><input type="checkbox"/> out of range (2)</p> |
|------------------------------------------------------------------------------------------------------------------------------------------------------------------------|

**Name:** Urine Glucose  
**DataType:** integer  
**Length:** 255  
**Description:**  
**Alias:** Glucose measurement, urine  
**RangeChecks:**

|             | Strongly disagree (1) | Disagree (2) | Neither agree nor disagree (3) | Agree (4) | Strongly agree (5) |
|-------------|-----------------------|--------------|--------------------------------|-----------|--------------------|
| Question    |                       |              |                                |           |                    |
| Codelist    |                       |              |                                |           |                    |
| Name        |                       |              |                                |           |                    |
| DataType    |                       |              |                                |           |                    |
| Length      |                       |              |                                |           |                    |
| Description |                       |              |                                |           |                    |
| Alias       |                       |              |                                |           |                    |
| RangeChecks |                       |              |                                |           |                    |
| Good match  |                       |              |                                |           |                    |
| Relevancy   |                       |              |                                |           |                    |

# Item 11/24: "Sodium"

Candidate 1/3

|                                                                                                                                    |
|------------------------------------------------------------------------------------------------------------------------------------|
| <p><b>Sodium</b></p> <hr style="border: 0; border-top: 1px solid black; margin: 5px 0;"/> <p style="text-align: right;">mmol/L</p> |
|------------------------------------------------------------------------------------------------------------------------------------|

**Name:** Sodium  
**DataType:** float  
**Length:** 10  
**Description:**  
**Alias:** Sodium measurement  
**RangeChecks:**

|                    | Strongly disagree (1) | Disagree (2) | Neither agree nor disagree (3) | Agree (4) | Strongly agree (5) |
|--------------------|-----------------------|--------------|--------------------------------|-----------|--------------------|
| <b>Question</b>    |                       |              |                                |           |                    |
| <b>Codelist</b>    |                       |              |                                |           |                    |
| <b>Name</b>        |                       |              |                                |           |                    |
| <b>DataType</b>    |                       |              |                                |           |                    |
| <b>Length</b>      |                       |              |                                |           |                    |
| <b>Description</b> |                       |              |                                |           |                    |
| <b>Alias</b>       |                       |              |                                |           |                    |
| <b>RangeChecks</b> |                       |              |                                |           |                    |
| <b>Good match</b>  |                       |              |                                |           |                    |
| <b>Relevancy</b>   |                       |              |                                |           |                    |

Candidate 2/3

|                                                                                           |
|-------------------------------------------------------------------------------------------|
| <p><b>Sodium</b></p> <hr style="border: 0; border-top: 1px solid black; margin: 5px 0;"/> |
|-------------------------------------------------------------------------------------------|

**Name:** Sodium  
**DataType:** float  
**Length:** 255  
**Description:**  
**Alias:** Sodium measurement  
**RangeChecks:**

|                    | Strongly disagree (1) | Disagree (2) | Neither agree nor disagree (3) | Agree (4) | Strongly agree (5) |
|--------------------|-----------------------|--------------|--------------------------------|-----------|--------------------|
| <b>Question</b>    |                       |              |                                |           |                    |
| <b>Codelist</b>    |                       |              |                                |           |                    |
| <b>Name</b>        |                       |              |                                |           |                    |
| <b>DataType</b>    |                       |              |                                |           |                    |
| <b>Length</b>      |                       |              |                                |           |                    |
| <b>Description</b> |                       |              |                                |           |                    |
| <b>Alias</b>       |                       |              |                                |           |                    |
| <b>RangeChecks</b> |                       |              |                                |           |                    |
| <b>Good match</b>  |                       |              |                                |           |                    |
| <b>Relevancy</b>   |                       |              |                                |           |                    |

Candidate 3/3

|                                                                                                                                    |
|------------------------------------------------------------------------------------------------------------------------------------|
| <p><b>Sodium</b></p> <hr style="border: 0; border-top: 1px solid black; margin: 5px 0;"/> <p style="text-align: right;">mmol/L</p> |
|------------------------------------------------------------------------------------------------------------------------------------|

**Name:** Sodium  
**DataType:** float  
**Length:** 255  
**Description:**  
**Alias:** Sodium measurement  
**RangeChecks:**

|                    | Strongly disagree (1) | Disagree (2) | Neither agree nor disagree (3) | Agree (4) | Strongly agree (5) |
|--------------------|-----------------------|--------------|--------------------------------|-----------|--------------------|
| <b>Question</b>    |                       |              |                                |           |                    |
| <b>Codelist</b>    |                       |              |                                |           |                    |
| <b>Name</b>        |                       |              |                                |           |                    |
| <b>DataType</b>    |                       |              |                                |           |                    |
| <b>Length</b>      |                       |              |                                |           |                    |
| <b>Description</b> |                       |              |                                |           |                    |
| <b>Alias</b>       |                       |              |                                |           |                    |
| <b>RangeChecks</b> |                       |              |                                |           |                    |
| <b>Good match</b>  |                       |              |                                |           |                    |
| <b>Relevancy</b>   |                       |              |                                |           |                    |

## Item 12/24: "Urea nitrogen"

Candidate 1/3

|                                                       |
|-------------------------------------------------------|
| <p><b>Blood urea nitrogen</b></p> <p>_____ mmol/L</p> |
|-------------------------------------------------------|

**Name:** Blood Urea Nitrogen

**DataType:** float

**Length:** 255

**Description:**

**Alias:** Blood urea nitrogen measurement

**RangeChecks:**

|             | Strongly disagree (1) | Disagree (2) | Neither agree nor disagree (3) | Agree (4) | Strongly agree (5) |
|-------------|-----------------------|--------------|--------------------------------|-----------|--------------------|
| Question    |                       |              |                                |           |                    |
| Codelist    |                       |              |                                |           |                    |
| Name        |                       |              |                                |           |                    |
| DataType    |                       |              |                                |           |                    |
| Length      |                       |              |                                |           |                    |
| Description |                       |              |                                |           |                    |
| Alias       |                       |              |                                |           |                    |
| RangeChecks |                       |              |                                |           |                    |
| Good match  |                       |              |                                |           |                    |
| Relevancy   |                       |              |                                |           |                    |

Candidate 2/3

|                                                                                                                                                                                                                                                                                        |
|----------------------------------------------------------------------------------------------------------------------------------------------------------------------------------------------------------------------------------------------------------------------------------------|
| <p><b>Serum Urea</b></p> <p><input type="checkbox"/> 0-5.9 mmol/L OR 0-.35 g/L (0)</p> <p><input type="checkbox"/> 6-9.9 mmol/L OR .36-.59 g/L (1)</p> <p><input type="checkbox"/> 10-19.9 mmol/L OR .60-1.19 g/L (3)</p> <p><input type="checkbox"/> ≥20 mmol/L OR ≥ 1.20 g/L (5)</p> |
|----------------------------------------------------------------------------------------------------------------------------------------------------------------------------------------------------------------------------------------------------------------------------------------|

**Name:** Serum Urea

**DataType:** integer

**Length:** 255

**Description:** Serum urea or serum urea nitrogen level

**Alias:** Urea measurement

**RangeChecks:**

|             | Strongly disagree (1) | Disagree (2) | Neither agree nor disagree (3) | Agree (4) | Strongly agree (5) |
|-------------|-----------------------|--------------|--------------------------------|-----------|--------------------|
| Question    |                       |              |                                |           |                    |
| Codelist    |                       |              |                                |           |                    |
| Name        |                       |              |                                |           |                    |
| DataType    |                       |              |                                |           |                    |
| Length      |                       |              |                                |           |                    |
| Description |                       |              |                                |           |                    |
| Alias       |                       |              |                                |           |                    |
| RangeChecks |                       |              |                                |           |                    |
| Good match  |                       |              |                                |           |                    |
| Relevancy   |                       |              |                                |           |                    |

Candidate 3/3

|                                                                                                                                                                                                                                                                                        |
|----------------------------------------------------------------------------------------------------------------------------------------------------------------------------------------------------------------------------------------------------------------------------------------|
| <p><b>Serum Urea</b></p> <p><input type="checkbox"/> 0-5.9 mmol/L OR 0-.35 g/L (0)</p> <p><input type="checkbox"/> 6-9.9 mmol/L OR .36-.59 g/L (1)</p> <p><input type="checkbox"/> 10-19.9 mmol/L OR .60-1.19 g/L (3)</p> <p><input type="checkbox"/> ≥20 mmol/L OR ≥ 1.20 g/L (5)</p> |
|----------------------------------------------------------------------------------------------------------------------------------------------------------------------------------------------------------------------------------------------------------------------------------------|

**Name:** Serum Urea Nitrogen

**DataType:** integer

**Length:** 255

**Description:** Serum urea or serum urea nitrogen level

**Alias:** Blood urea nitrogen measurement

**RangeChecks:**

|             | Strongly disagree (1) | Disagree (2) | Neither agree nor disagree (3) | Agree (4) | Strongly agree (5) |
|-------------|-----------------------|--------------|--------------------------------|-----------|--------------------|
| Question    |                       |              |                                |           |                    |
| Codelist    |                       |              |                                |           |                    |
| Name        |                       |              |                                |           |                    |
| DataType    |                       |              |                                |           |                    |
| Length      |                       |              |                                |           |                    |
| Description |                       |              |                                |           |                    |
| Alias       |                       |              |                                |           |                    |
| RangeChecks |                       |              |                                |           |                    |
| Good match  |                       |              |                                |           |                    |
| Relevancy   |                       |              |                                |           |                    |

## Item 13/24: "Myocardial Infarction"

Candidate 1/3

**Myocardial Infarction**

Yes

No

**Name:** myocardial infarction  
**Data Type:** boolean  
**Length:**  
**Description:** Myocardial infarction  
**Alias:** Myocardial Infarction  
**RangeChecks:**

|             | Strongly disagree (1) | Disagree (2) | Neither agree nor disagree (3) | Agree (4) | Strongly agree (5) |
|-------------|-----------------------|--------------|--------------------------------|-----------|--------------------|
| Question    |                       |              |                                |           |                    |
| Codelist    |                       |              |                                |           |                    |
| Name        |                       |              |                                |           |                    |
| Data Type   |                       |              |                                |           |                    |
| Length      |                       |              |                                |           |                    |
| Description |                       |              |                                |           |                    |
| Alias       |                       |              |                                |           |                    |
| RangeChecks |                       |              |                                |           |                    |
| Good match  |                       |              |                                |           |                    |
| Relevancy   |                       |              |                                |           |                    |

Candidate 2/3

**Myocardial Infarction**

no (0)

yes (1)

**Name:** Myocardial Infarction  
**Data Type:** integer  
**Length:** 255  
**Description:**  
**Alias:** Myocardial Infarction  
**RangeChecks:**

|             | Strongly disagree (1) | Disagree (2) | Neither agree nor disagree (3) | Agree (4) | Strongly agree (5) |
|-------------|-----------------------|--------------|--------------------------------|-----------|--------------------|
| Question    |                       |              |                                |           |                    |
| Codelist    |                       |              |                                |           |                    |
| Name        |                       |              |                                |           |                    |
| Data Type   |                       |              |                                |           |                    |
| Length      |                       |              |                                |           |                    |
| Description |                       |              |                                |           |                    |
| Alias       |                       |              |                                |           |                    |
| RangeChecks |                       |              |                                |           |                    |
| Good match  |                       |              |                                |           |                    |
| Relevancy   |                       |              |                                |           |                    |

Candidate 3/3

**Myocardial Infarction**

Yes

No

**Name:** Myocardial infarction  
**Data Type:** boolean  
**Length:**  
**Description:**  
**Alias:** Myocardial Infarction  
**RangeChecks:**

|             | Strongly disagree (1) | Disagree (2) | Neither agree nor disagree (3) | Agree (4) | Strongly agree (5) |
|-------------|-----------------------|--------------|--------------------------------|-----------|--------------------|
| Question    |                       |              |                                |           |                    |
| Codelist    |                       |              |                                |           |                    |
| Name        |                       |              |                                |           |                    |
| Data Type   |                       |              |                                |           |                    |
| Length      |                       |              |                                |           |                    |
| Description |                       |              |                                |           |                    |
| Alias       |                       |              |                                |           |                    |
| RangeChecks |                       |              |                                |           |                    |
| Good match  |                       |              |                                |           |                    |
| Relevancy   |                       |              |                                |           |                    |

# Item 14/24: "Coronary Artery Bypass Surgery"

Candidate 1/3

**CABG**

Yes

No

**Name:** History of coronary artery bypass grafting

**DataType:** boolean

**Length:**

**Description:** Coronary Artery Bypass Surgery

**Alias:** History of coronary artery bypass grafting

**RangeChecks:**

|             | Strongly disagree (1) | Disagree (2) | Neither agree nor disagree (3) | Agree (4) | Strongly agree (5) |
|-------------|-----------------------|--------------|--------------------------------|-----------|--------------------|
| Question    |                       |              |                                |           |                    |
| Codelist    |                       |              |                                |           |                    |
| Name        |                       |              |                                |           |                    |
| DataType    |                       |              |                                |           |                    |
| Length      |                       |              |                                |           |                    |
| Description |                       |              |                                |           |                    |
| Alias       |                       |              |                                |           |                    |
| RangeChecks |                       |              |                                |           |                    |
| Good match  |                       |              |                                |           |                    |
| Relevancy   |                       |              |                                |           |                    |

Candidate 2/3

**Coronary artery bypass surgery (CABG-Op)**

Yes

No

**Name:** CABG-Op

**DataType:** boolean

**Length:**

**Description:** Coronary artery bypass surgery (CABG-Op)

**Alias:** Coronary Artery Bypass Surgery

**RangeChecks:**

|             | Strongly disagree (1) | Disagree (2) | Neither agree nor disagree (3) | Agree (4) | Strongly agree (5) |
|-------------|-----------------------|--------------|--------------------------------|-----------|--------------------|
| Question    |                       |              |                                |           |                    |
| Codelist    |                       |              |                                |           |                    |
| Name        |                       |              |                                |           |                    |
| DataType    |                       |              |                                |           |                    |
| Length      |                       |              |                                |           |                    |
| Description |                       |              |                                |           |                    |
| Alias       |                       |              |                                |           |                    |
| RangeChecks |                       |              |                                |           |                    |
| Good match  |                       |              |                                |           |                    |
| Relevancy   |                       |              |                                |           |                    |

Candidate 3/3

**Coronary Artery Bypass Surgery**

Yes

No

**Name:** Coronary Artery Bypass Surgery

**DataType:** boolean

**Length:**

**Description:**

**Alias:** Coronary Artery Bypass Surgery

**RangeChecks:**

|             | Strongly disagree (1) | Disagree (2) | Neither agree nor disagree (3) | Agree (4) | Strongly agree (5) |
|-------------|-----------------------|--------------|--------------------------------|-----------|--------------------|
| Question    |                       |              |                                |           |                    |
| Codelist    |                       |              |                                |           |                    |
| Name        |                       |              |                                |           |                    |
| DataType    |                       |              |                                |           |                    |
| Length      |                       |              |                                |           |                    |
| Description |                       |              |                                |           |                    |
| Alias       |                       |              |                                |           |                    |
| RangeChecks |                       |              |                                |           |                    |
| Good match  |                       |              |                                |           |                    |
| Relevancy   |                       |              |                                |           |                    |

## Item 15/24: “Angina Pectoris”

Candidate 1/3

**Angina pectoris**

I. Ordinary physical activity does not cause angina (I. Ordinary physical activity does not cause angina)

II. Slight limitation of ordinary activity (II. Slight limitation of ordinary activity)

III. Marked limitation of ordinary activity (III. Marked limitation of ordinary activity)

IV. Inability to carry out any physical activity without discomfort - angina syndrome may be present at rest (IV. Inability to carry out any physical activity without discomfort - angina syndrome may be present at rest)

**Name:** Angina pectoris

**DataType:** text

**Length:**

**Description:**

**Alias:** Angina Pectoris

**RangeChecks:**

|             | Strongly disagree (1) | Disagree (2) | Neither agree nor disagree (3) | Agree (4) | Strongly agree (5) |
|-------------|-----------------------|--------------|--------------------------------|-----------|--------------------|
| Question    |                       |              |                                |           |                    |
| Codelist    |                       |              |                                |           |                    |
| Name        |                       |              |                                |           |                    |
| DataType    |                       |              |                                |           |                    |
| Length      |                       |              |                                |           |                    |
| Description |                       |              |                                |           |                    |
| Alias       |                       |              |                                |           |                    |
| RangeChecks |                       |              |                                |           |                    |
| Good match  |                       |              |                                |           |                    |
| Relevancy   |                       |              |                                |           |                    |

Candidate 2/3

**Angina**

Yes

No

**Name:** History of Angina pectoris

**DataType:** boolean

**Length:**

**Description:** Angina pectoris

**Alias:** H/O: angina pectoris

**RangeChecks:**

|             | Strongly disagree (1) | Disagree (2) | Neither agree nor disagree (3) | Agree (4) | Strongly agree (5) |
|-------------|-----------------------|--------------|--------------------------------|-----------|--------------------|
| Question    |                       |              |                                |           |                    |
| Codelist    |                       |              |                                |           |                    |
| Name        |                       |              |                                |           |                    |
| DataType    |                       |              |                                |           |                    |
| Length      |                       |              |                                |           |                    |
| Description |                       |              |                                |           |                    |
| Alias       |                       |              |                                |           |                    |
| RangeChecks |                       |              |                                |           |                    |
| Good match  |                       |              |                                |           |                    |
| Relevancy   |                       |              |                                |           |                    |

Candidate 3/3

**Angina Pectoris**

yes (1)

no (2)

unknown (3)

**Name:** angina  
**DataType:** text  
**Length:** 80  
**Description:**  
**Alias:** Angina Pectoris  
**RangeChecks:**

|                    | Strongly disagree (1) | Disagree (2) | Neither agree nor disagree (3) | Agree (4) | Strongly agree (5) |
|--------------------|-----------------------|--------------|--------------------------------|-----------|--------------------|
| <b>Question</b>    |                       |              |                                |           |                    |
| <b>Codelist</b>    |                       |              |                                |           |                    |
| <b>Name</b>        |                       |              |                                |           |                    |
| <b>DataType</b>    |                       |              |                                |           |                    |
| <b>Length</b>      |                       |              |                                |           |                    |
| <b>Description</b> |                       |              |                                |           |                    |
| <b>Alias</b>       |                       |              |                                |           |                    |
| <b>RangeChecks</b> |                       |              |                                |           |                    |
| <b>Good match</b>  |                       |              |                                |           |                    |
| <b>Relevancy</b>   |                       |              |                                |           |                    |

## Item 16/24: "Myocardial Ischemia"

Candidate 1/3

**evidence of myocardial ischemia**

Yes

No

**Name:** Myocardial Ischemia Evidence of

**DataType:** boolean

**Length:**

**Description:**

**Alias:** Myocardial Ischemia, Evidence of (contextual qualifier)

**RangeChecks:**

|             | Strongly disagree (1) | Disagree (2) | Neither agree nor disagree (3) | Agree (4) | Strongly agree (5) |
|-------------|-----------------------|--------------|--------------------------------|-----------|--------------------|
| Question    |                       |              |                                |           |                    |
| Codelist    |                       |              |                                |           |                    |
| Name        |                       |              |                                |           |                    |
| DataType    |                       |              |                                |           |                    |
| Length      |                       |              |                                |           |                    |
| Description |                       |              |                                |           |                    |
| Alias       |                       |              |                                |           |                    |
| RangeChecks |                       |              |                                |           |                    |
| Good match  |                       |              |                                |           |                    |
| Relevancy   |                       |              |                                |           |                    |

Candidate 2/3

**exercise-induced myocardial ischemia**

Yes

No

**Name:** Myocardial Ischemia exercise induced

**DataType:** boolean

**Length:**

**Description:**

**Alias:** Myocardial Ischemia, exercise induced

**RangeChecks:**

|             | Strongly disagree (1) | Disagree (2) | Neither agree nor disagree (3) | Agree (4) | Strongly agree (5) |
|-------------|-----------------------|--------------|--------------------------------|-----------|--------------------|
| Question    |                       |              |                                |           |                    |
| Codelist    |                       |              |                                |           |                    |
| Name        |                       |              |                                |           |                    |
| DataType    |                       |              |                                |           |                    |
| Length      |                       |              |                                |           |                    |
| Description |                       |              |                                |           |                    |
| Alias       |                       |              |                                |           |                    |
| RangeChecks |                       |              |                                |           |                    |
| Good match  |                       |              |                                |           |                    |
| Relevancy   |                       |              |                                |           |                    |

Candidate 3/3

**5. Other interventions: [6] ECG**

Yes

No

**Name:** Other interventions ECG

**DataType:** boolean

**Length:**

**Description:** Select all that apply. Complete the ECG evidence of myocardial ischemia/infarction form for ALL ECGs related to this event.

**Alias:** Electrocardiogram, Other

**RangeChecks:**

|             | Strongly disagree (1) | Disagree (2) | Neither agree nor disagree (3) | Agree (4) | Strongly agree (5) |
|-------------|-----------------------|--------------|--------------------------------|-----------|--------------------|
| Question    |                       |              |                                |           |                    |
| Codelist    |                       |              |                                |           |                    |
| Name        |                       |              |                                |           |                    |
| DataType    |                       |              |                                |           |                    |
| Length      |                       |              |                                |           |                    |
| Description |                       |              |                                |           |                    |
| Alias       |                       |              |                                |           |                    |
| RangeChecks |                       |              |                                |           |                    |
| Good match  |                       |              |                                |           |                    |
| Relevancy   |                       |              |                                |           |                    |

## Item 17/24: "Coronary heart disease"

### Candidate 1/3

**Any contraindication to the use of Adrenaline**

Yes

No

**Name:** Contraindication

**DataType:** boolean

**Length:**

**Description:** i.e: severe acute coronary heart disease, severe hypertension

**Alias:** Medical contraindication

**RangeChecks:**

|             | Strongly disagree (1) | Disagree (2) | Neither agree nor disagree (3) | Agree (4) | Strongly agree (5) |
|-------------|-----------------------|--------------|--------------------------------|-----------|--------------------|
| Question    |                       |              |                                |           |                    |
| Codelist    |                       |              |                                |           |                    |
| Name        |                       |              |                                |           |                    |
| DataType    |                       |              |                                |           |                    |
| Length      |                       |              |                                |           |                    |
| Description |                       |              |                                |           |                    |
| Alias       |                       |              |                                |           |                    |
| RangeChecks |                       |              |                                |           |                    |
| Good match  |                       |              |                                |           |                    |
| Relevancy   |                       |              |                                |           |                    |

### Candidate 2/3

**Coronary Artery Disease (heart disease)**

No (No)

Yes (Yes)

Unknown (Unknown)

**Name:** ChronicDiseaseCoronaryArteryInd-3

**DataType:** text

**Length:** 7

**Description:**

**Alias:**

**RangeChecks:**

|             | Strongly disagree (1) | Disagree (2) | Neither agree nor disagree (3) | Agree (4) | Strongly agree (5) |
|-------------|-----------------------|--------------|--------------------------------|-----------|--------------------|
| Question    |                       |              |                                |           |                    |
| Codelist    |                       |              |                                |           |                    |
| Name        |                       |              |                                |           |                    |
| DataType    |                       |              |                                |           |                    |
| Length      |                       |              |                                |           |                    |
| Description |                       |              |                                |           |                    |
| Alias       |                       |              |                                |           |                    |
| RangeChecks |                       |              |                                |           |                    |
| Good match  |                       |              |                                |           |                    |
| Relevancy   |                       |              |                                |           |                    |

### Candidate 3/3

**coronary heart disease**

Yes

No

**Name:** Coronary heart disease

**DataType:** boolean

**Length:**

**Description:**

**Alias:** Coronary heart disease

**RangeChecks:**

|             | Strongly disagree (1) | Disagree (2) | Neither agree nor disagree (3) | Agree (4) | Strongly agree (5) |
|-------------|-----------------------|--------------|--------------------------------|-----------|--------------------|
| Question    |                       |              |                                |           |                    |
| Codelist    |                       |              |                                |           |                    |
| Name        |                       |              |                                |           |                    |
| DataType    |                       |              |                                |           |                    |
| Length      |                       |              |                                |           |                    |
| Description |                       |              |                                |           |                    |
| Alias       |                       |              |                                |           |                    |
| RangeChecks |                       |              |                                |           |                    |
| Good match  |                       |              |                                |           |                    |
| Relevancy   |                       |              |                                |           |                    |

## Item 18/24: “Coronary revascularisation”

Candidate 1/3

**[4] Non-coronary revascularisation**

Yes

No

**Name:** Hospitalisation for Non-coronary revascularisation

**DataType:** boolean

**Length:**

**Description:**

**Alias:** Coronary revascularisation

**RangeChecks:**

|             | Strongly disagree (1) | Disagree (2) | Neither agree nor disagree (3) | Agree (4) | Strongly agree (5) |
|-------------|-----------------------|--------------|--------------------------------|-----------|--------------------|
| Question    |                       |              |                                |           |                    |
| Codelist    |                       |              |                                |           |                    |
| Name        |                       |              |                                |           |                    |
| DataType    |                       |              |                                |           |                    |
| Length      |                       |              |                                |           |                    |
| Description |                       |              |                                |           |                    |
| Alias       |                       |              |                                |           |                    |
| RangeChecks |                       |              |                                |           |                    |
| Good match  |                       |              |                                |           |                    |
| Relevancy   |                       |              |                                |           |                    |

Candidate 2/3

**4. Has the subject undergone a coronary revascularisation since the last visit?**

Yes (Y)

No (N)

Question not asked (Z)

**Name:** coronary revascularisation

**DataType:** text

**Length:** 255

**Description:** Yes - complete SAE and Revascularisation endpoint form

**Alias:** Coronary revascularisation, Percutaneous Coronary Intervention

**RangeChecks:**

|             | Strongly disagree (1) | Disagree (2) | Neither agree nor disagree (3) | Agree (4) | Strongly agree (5) |
|-------------|-----------------------|--------------|--------------------------------|-----------|--------------------|
| Question    |                       |              |                                |           |                    |
| Codelist    |                       |              |                                |           |                    |
| Name        |                       |              |                                |           |                    |
| DataType    |                       |              |                                |           |                    |
| Length      |                       |              |                                |           |                    |
| Description |                       |              |                                |           |                    |
| Alias       |                       |              |                                |           |                    |
| RangeChecks |                       |              |                                |           |                    |
| Good match  |                       |              |                                |           |                    |
| Relevancy   |                       |              |                                |           |                    |

### Candidate 3/3

|                                                                                      |
|--------------------------------------------------------------------------------------|
| <p><b>Time of revascularisation<br/>percutaneous coronary intervention</b></p> <hr/> |
|--------------------------------------------------------------------------------------|

**Name:** Revascularisation percutaneous coronary intervention date

**DataType:** date

**Length:**

**Description:**

Person—revascularisation percutaneous coronary intervention date, DDMMYYYY

Obligation: Conditional

Identifying and definitional attributes

Short name: Date of revascularisation percutaneous coronary intervention

Synonymous names: Revascularisation PCI date

METeOR identifier: 359731

Registration status: Health, Standard 01/10/2008

Definition: The date when a percutaneous coronary intervention (PCI) is performed for revascularisation.

Data Element Concept: Person—revascularisation percutaneous coronary intervention date

Value domain attributes

Representational attributes

Representation class: Date

Data type: Date/Time

Format: DDMMYYYY

Maximum character length: 8

Data set specification specific attributes

Coronary artery cluster

Conditional obligation: Record when a percutaneous coronary intervention is performed for revascularisation.

Data element attributes

Collection and usage attributes

Guide for use: Revascularisation PCI relates to balloon angioplasty inflation and/or stent implantation performed for subsequent restoration of blood flow.

Comments: Routine revascularisation PCI may be performed after ST-segment-elevation myocardial infarction for people with objective evidence of recurrent myocardial infarction in whom there is spontaneous or inducible ischaemia or haemodynamic instability. Revascularisation PCI may also be performed for treatment of high-risk non-ST-segment-elevation acute coronary syndrome.

Source and reference attributes

Reference documents: National Heart Foundation of Australia & Cardiac Society of Australia and New Zealand. Guidelines for the management of acute coronary syndromes 2006. Med J Aust 2006; 184; S1-S32. © MJA 2006

Relational attributes

Implementation in Data Set Specifications: Coronary artery cluster Health, Standard 01/10/2008

**Alias:**

**RangeChecks:**

|                    | Strongly disagree (1) | Disagree (2) | Neither agree nor disagree (3) | Agree (4) | Strongly agree (5) |
|--------------------|-----------------------|--------------|--------------------------------|-----------|--------------------|
| <b>Question</b>    |                       |              |                                |           |                    |
| <b>Codelist</b>    |                       |              |                                |           |                    |
| <b>Name</b>        |                       |              |                                |           |                    |
| <b>DataType</b>    |                       |              |                                |           |                    |
| <b>Length</b>      |                       |              |                                |           |                    |
| <b>Description</b> |                       |              |                                |           |                    |
| <b>Alias</b>       |                       |              |                                |           |                    |
| <b>RangeChecks</b> |                       |              |                                |           |                    |
| <b>Good match</b>  |                       |              |                                |           |                    |
| <b>Relevancy</b>   |                       |              |                                |           |                    |

## Item 19/24: "Cerebrovascular accident"

Candidate 1/3

**Cerebrovascular Accident**

no (0)

yes (1)

**Name:** Cerebrovascular Accident

**DataType:** integer

**Length:** 255

**Description:**

**Alias:** Cerebrovascular accident

**RangeChecks:**

|             | Strongly disagree (1) | Disagree (2) | Neither agree nor disagree (3) | Agree (4) | Strongly agree (5) |
|-------------|-----------------------|--------------|--------------------------------|-----------|--------------------|
| Question    |                       |              |                                |           |                    |
| Codelist    |                       |              |                                |           |                    |
| Name        |                       |              |                                |           |                    |
| DataType    |                       |              |                                |           |                    |
| Length      |                       |              |                                |           |                    |
| Description |                       |              |                                |           |                    |
| Alias       |                       |              |                                |           |                    |
| RangeChecks |                       |              |                                |           |                    |
| Good match  |                       |              |                                |           |                    |
| Relevancy   |                       |              |                                |           |                    |

Candidate 2/3

**Cerebrovascular accident within one yar**

Yes

No

**Name:** Stroke

**DataType:** boolean

**Length:**

**Description:** Cerebrovascular accident within one yar

**Alias:** Cerebrovascular accident

**RangeChecks:**

|             | Strongly disagree (1) | Disagree (2) | Neither agree nor disagree (3) | Agree (4) | Strongly agree (5) |
|-------------|-----------------------|--------------|--------------------------------|-----------|--------------------|
| Question    |                       |              |                                |           |                    |
| Codelist    |                       |              |                                |           |                    |
| Name        |                       |              |                                |           |                    |
| DataType    |                       |              |                                |           |                    |
| Length      |                       |              |                                |           |                    |
| Description |                       |              |                                |           |                    |
| Alias       |                       |              |                                |           |                    |
| RangeChecks |                       |              |                                |           |                    |
| Good match  |                       |              |                                |           |                    |
| Relevancy   |                       |              |                                |           |                    |

Candidate 3/3

**Cerebrovascular disease**

No (1)

Yes (2)

Not evaluated (3)

**Name:** Cerebrovascular disease

**DataType:** integer

**Length:** 255

**Description:** Transient ischemic attack or cerebrovascular accident

**Alias:** Cerebrovascular Disorders

**RangeChecks:**

|             | Strongly disagree (1) | Disagree (2) | Neither agree nor disagree (3) | Agree (4) | Strongly agree (5) |
|-------------|-----------------------|--------------|--------------------------------|-----------|--------------------|
| Question    |                       |              |                                |           |                    |
| Codelist    |                       |              |                                |           |                    |
| Name        |                       |              |                                |           |                    |
| DataType    |                       |              |                                |           |                    |
| Length      |                       |              |                                |           |                    |
| Description |                       |              |                                |           |                    |
| Alias       |                       |              |                                |           |                    |
| RangeChecks |                       |              |                                |           |                    |
| Good match  |                       |              |                                |           |                    |
| Relevancy   |                       |              |                                |           |                    |

## Item 20/24: "Hemorrhage"

Candidate 1/3

**Is a vitreous hemorrhage present?**

No (1)

Trace (2)

1+ (3)

2+ (4)

3+ (5)

4+ (6)

Note Done (7)

**Name:** Vitreous Hemorrhage  
**DataType:** integer  
**Length:** 255  
**Description:**  
**Alias:** Vitreous Hemorrhage  
**RangeChecks:**

|             | Strongly disagree (1) | Disagree (2) | Neither agree nor disagree (3) | Agree (4) | Strongly agree (5) |
|-------------|-----------------------|--------------|--------------------------------|-----------|--------------------|
| Question    |                       |              |                                |           |                    |
| Codelist    |                       |              |                                |           |                    |
| Name        |                       |              |                                |           |                    |
| DataType    |                       |              |                                |           |                    |
| Length      |                       |              |                                |           |                    |
| Description |                       |              |                                |           |                    |
| Alias       |                       |              |                                |           |                    |
| RangeChecks |                       |              |                                |           |                    |
| Good match  |                       |              |                                |           |                    |
| Relevancy   |                       |              |                                |           |                    |

Candidate 2/3

**Hemorrhage**

Yes

No

**Name:** Hemorrhage  
**DataType:** boolean  
**Length:**  
**Description:**  
**Alias:**  
**RangeChecks:**

|             | Strongly disagree (1) | Disagree (2) | Neither agree nor disagree (3) | Agree (4) | Strongly agree (5) |
|-------------|-----------------------|--------------|--------------------------------|-----------|--------------------|
| Question    |                       |              |                                |           |                    |
| Codelist    |                       |              |                                |           |                    |
| Name        |                       |              |                                |           |                    |
| DataType    |                       |              |                                |           |                    |
| Length      |                       |              |                                |           |                    |
| Description |                       |              |                                |           |                    |
| Alias       |                       |              |                                |           |                    |
| RangeChecks |                       |              |                                |           |                    |
| Good match  |                       |              |                                |           |                    |
| Relevancy   |                       |              |                                |           |                    |

Candidate 3/3

**Retinal Hemorrhage**

Yes

No

**Name:** Retinal Hemorrhage  
**DataType:** boolean  
**Length:**  
**Description:**  
**Alias:** Retinal Hemorrhage  
**RangeChecks:**

|             | Strongly disagree (1) | Disagree (2) | Neither agree nor disagree (3) | Agree (4) | Strongly agree (5) |
|-------------|-----------------------|--------------|--------------------------------|-----------|--------------------|
| Question    |                       |              |                                |           |                    |
| Codelist    |                       |              |                                |           |                    |
| Name        |                       |              |                                |           |                    |
| DataType    |                       |              |                                |           |                    |
| Length      |                       |              |                                |           |                    |
| Description |                       |              |                                |           |                    |
| Alias       |                       |              |                                |           |                    |
| RangeChecks |                       |              |                                |           |                    |
| Good match  |                       |              |                                |           |                    |
| Relevancy   |                       |              |                                |           |                    |

## Item 21/24: “Transient Ischemic Attack”

Candidate 1/3

**History of transient ischemic attack (TIA)**

Yes

No

**Name:** History of TIA

**DataType:** boolean

**Length:**

**Description:** History of transient ischemic attack (TIA)

**Alias:** H/O: TIA

**RangeChecks:**

|             | Strongly disagree (1) | Disagree (2) | Neither agree nor disagree (3) | Agree (4) | Strongly agree (5) |
|-------------|-----------------------|--------------|--------------------------------|-----------|--------------------|
| Question    |                       |              |                                |           |                    |
| Codelist    |                       |              |                                |           |                    |
| Name        |                       |              |                                |           |                    |
| DataType    |                       |              |                                |           |                    |
| Length      |                       |              |                                |           |                    |
| Description |                       |              |                                |           |                    |
| Alias       |                       |              |                                |           |                    |
| RangeChecks |                       |              |                                |           |                    |
| Good match  |                       |              |                                |           |                    |
| Relevancy   |                       |              |                                |           |                    |

Candidate 2/3

**Transient Ischemic Attack**

no (0)

yes (1)

**Name:** Transient Ischemic Attack

**DataType:** integer

**Length:** 255

**Description:**

**Alias:** Transient Ischemic Attack

**RangeChecks:**

|             | Strongly disagree (1) | Disagree (2) | Neither agree nor disagree (3) | Agree (4) | Strongly agree (5) |
|-------------|-----------------------|--------------|--------------------------------|-----------|--------------------|
| Question    |                       |              |                                |           |                    |
| Codelist    |                       |              |                                |           |                    |
| Name        |                       |              |                                |           |                    |
| DataType    |                       |              |                                |           |                    |
| Length      |                       |              |                                |           |                    |
| Description |                       |              |                                |           |                    |
| Alias       |                       |              |                                |           |                    |
| RangeChecks |                       |              |                                |           |                    |
| Good match  |                       |              |                                |           |                    |
| Relevancy   |                       |              |                                |           |                    |

Candidate 3/3

**Stroke/transient ischemic attack (TIA)**

Yes

No

**Name:** Stroke or TIA

**DataType:** boolean

**Length:** 7

**Description:** Stroke/transient ischemic attack (TIA)

**Alias:** Yes, No, or Unknown Response

**RangeChecks:**

|             | Strongly disagree (1) | Disagree (2) | Neither agree nor disagree (3) | Agree (4) | Strongly agree (5) |
|-------------|-----------------------|--------------|--------------------------------|-----------|--------------------|
| Question    |                       |              |                                |           |                    |
| Codelist    |                       |              |                                |           |                    |
| Name        |                       |              |                                |           |                    |
| DataType    |                       |              |                                |           |                    |
| Length      |                       |              |                                |           |                    |
| Description |                       |              |                                |           |                    |
| Alias       |                       |              |                                |           |                    |
| RangeChecks |                       |              |                                |           |                    |
| Good match  |                       |              |                                |           |                    |
| Relevancy   |                       |              |                                |           |                    |

## Item 22/24: "Muscle Weakness"

Candidate 1/3

**Muscle weakness**

Yes

No

**Name:** Muscle weakness

**DataType:** boolean

**Length:**

**Description:**

**Alias:** Muscle Weakness

**RangeChecks:**

|             | Strongly disagree (1) | Disagree (2) | Neither agree nor disagree (3) | Agree (4) | Strongly agree (5) |
|-------------|-----------------------|--------------|--------------------------------|-----------|--------------------|
| Question    |                       |              |                                |           |                    |
| Codelist    |                       |              |                                |           |                    |
| Name        |                       |              |                                |           |                    |
| DataType    |                       |              |                                |           |                    |
| Length      |                       |              |                                |           |                    |
| Description |                       |              |                                |           |                    |
| Alias       |                       |              |                                |           |                    |
| RangeChecks |                       |              |                                |           |                    |
| Good match  |                       |              |                                |           |                    |
| Relevancy   |                       |              |                                |           |                    |

Candidate 2/3

**39. Muscle weakness**

Not limited ([C08])

Limited a little ([C09])

Limited a lot ([C10])

**Name:** Muscle weakness

**DataType:** text

**Length:** 255

**Description:**

**Alias:** Muscle Weakness

**RangeChecks:**

|             | Strongly disagree (1) | Disagree (2) | Neither agree nor disagree (3) | Agree (4) | Strongly agree (5) |
|-------------|-----------------------|--------------|--------------------------------|-----------|--------------------|
| Question    |                       |              |                                |           |                    |
| Codelist    |                       |              |                                |           |                    |
| Name        |                       |              |                                |           |                    |
| DataType    |                       |              |                                |           |                    |
| Length      |                       |              |                                |           |                    |
| Description |                       |              |                                |           |                    |
| Alias       |                       |              |                                |           |                    |
| RangeChecks |                       |              |                                |           |                    |
| Good match  |                       |              |                                |           |                    |
| Relevancy   |                       |              |                                |           |                    |

Candidate 3/3

**Musculoskeletal Muscle atrophy or weakness**

Yes

No

**Name:** muscle atrophy or weakness

**DataType:** boolean

**Length:**

**Description:**

**Alias:** Muscular Atrophy, Muscle Weakness

**RangeChecks:**

|             | Strongly disagree (1) | Disagree (2) | Neither agree nor disagree (3) | Agree (4) | Strongly agree (5) |
|-------------|-----------------------|--------------|--------------------------------|-----------|--------------------|
| Question    |                       |              |                                |           |                    |
| Codelist    |                       |              |                                |           |                    |
| Name        |                       |              |                                |           |                    |
| DataType    |                       |              |                                |           |                    |
| Length      |                       |              |                                |           |                    |
| Description |                       |              |                                |           |                    |
| Alias       |                       |              |                                |           |                    |
| RangeChecks |                       |              |                                |           |                    |
| Good match  |                       |              |                                |           |                    |
| Relevancy   |                       |              |                                |           |                    |

## Item 23/24: "grip strength test left hand"

Candidate 1/3

**Left Grip Strength Max-Grip Test 1**

---

**Name:** Left Grip Strength  
**DataType:** integer  
**Length:** 7  
**Description:**  
**Alias:** grip strength test left hand  
**RangeChecks:**

|             | Strongly disagree (1) | Disagree (2) | Neither agree nor disagree (3) | Agree (4) | Strongly agree (5) |
|-------------|-----------------------|--------------|--------------------------------|-----------|--------------------|
| Question    |                       |              |                                |           |                    |
| Codelist    |                       |              |                                |           |                    |
| Name        |                       |              |                                |           |                    |
| DataType    |                       |              |                                |           |                    |
| Length      |                       |              |                                |           |                    |
| Description |                       |              |                                |           |                    |
| Alias       |                       |              |                                |           |                    |
| RangeChecks |                       |              |                                |           |                    |
| Good match  |                       |              |                                |           |                    |
| Relevancy   |                       |              |                                |           |                    |

Candidate 2/3

**Left Grip Strength Max-Grip Test 1**

pounds (lb)

kilograms (kg)

newtons (N)

**Name:** Left Grip Strength  
**DataType:** integer  
**Length:** 7  
**Description:**  
**Alias:** grip strength test left hand  
**RangeChecks:**

|             | Strongly disagree (1) | Disagree (2) | Neither agree nor disagree (3) | Agree (4) | Strongly agree (5) |
|-------------|-----------------------|--------------|--------------------------------|-----------|--------------------|
| Question    |                       |              |                                |           |                    |
| Codelist    |                       |              |                                |           |                    |
| Name        |                       |              |                                |           |                    |
| DataType    |                       |              |                                |           |                    |
| Length      |                       |              |                                |           |                    |
| Description |                       |              |                                |           |                    |
| Alias       |                       |              |                                |           |                    |
| RangeChecks |                       |              |                                |           |                    |
| Good match  |                       |              |                                |           |                    |
| Relevancy   |                       |              |                                |           |                    |

Candidate 3/3

**Left Grip Strength Max-Grip Test 2**

---

**Name:** Left Grip Strength  
**DataType:** integer  
**Length:** 7  
**Description:**  
**Alias:** grip strength test left hand  
**RangeChecks:**

|             | Strongly disagree (1) | Disagree (2) | Neither agree nor disagree (3) | Agree (4) | Strongly agree (5) |
|-------------|-----------------------|--------------|--------------------------------|-----------|--------------------|
| Question    |                       |              |                                |           |                    |
| Codelist    |                       |              |                                |           |                    |
| Name        |                       |              |                                |           |                    |
| DataType    |                       |              |                                |           |                    |
| Length      |                       |              |                                |           |                    |
| Description |                       |              |                                |           |                    |
| Alias       |                       |              |                                |           |                    |
| RangeChecks |                       |              |                                |           |                    |
| Good match  |                       |              |                                |           |                    |
| Relevancy   |                       |              |                                |           |                    |

## Item 24/24: "Dysarthria"

Candidate 1/3

**Dysarthria**

yes (1)

**Name:** Dysarthrie  
**Data Type:** integer  
**Length:**  
**Description:** Dysarthrie  
**Alias:** Dysarthria  
**RangeChecks:**

|             | Strongly disagree (1) | Disagree (2) | Neither agree nor disagree (3) | Agree (4) | Strongly agree (5) |
|-------------|-----------------------|--------------|--------------------------------|-----------|--------------------|
| Question    |                       |              |                                |           |                    |
| Codelist    |                       |              |                                |           |                    |
| Name        |                       |              |                                |           |                    |
| Data Type   |                       |              |                                |           |                    |
| Length      |                       |              |                                |           |                    |
| Description |                       |              |                                |           |                    |
| Alias       |                       |              |                                |           |                    |
| RangeChecks |                       |              |                                |           |                    |
| Good match  |                       |              |                                |           |                    |
| Relevancy   |                       |              |                                |           |                    |

Candidate 2/3

**Dysarthria**

Yes (1)

No (2)

Unsure (3)

Not recorded (4)

**Name:** Neurological impairment: Dysarthria  
**Data Type:** integer  
**Length:** 255  
**Description:**  
**Alias:** Neurologic Deficits; Dysarthria  
**RangeChecks:**

|             | Strongly disagree (1) | Disagree (2) | Neither agree nor disagree (3) | Agree (4) | Strongly agree (5) |
|-------------|-----------------------|--------------|--------------------------------|-----------|--------------------|
| Question    |                       |              |                                |           |                    |
| Codelist    |                       |              |                                |           |                    |
| Name        |                       |              |                                |           |                    |
| Data Type   |                       |              |                                |           |                    |
| Length      |                       |              |                                |           |                    |
| Description |                       |              |                                |           |                    |
| Alias       |                       |              |                                |           |                    |
| RangeChecks |                       |              |                                |           |                    |
| Good match  |                       |              |                                |           |                    |
| Relevancy   |                       |              |                                |           |                    |

Candidate 3/3

**Dysarthria**

Yes

No

**Name:** Dysarthria  
**Data Type:** boolean  
**Length:**  
**Description:**  
**Alias:** Dysarthria:Find:Pt:Patient:Ord:NIHSS  
**RangeChecks:**

|             | Strongly disagree (1) | Disagree (2) | Neither agree nor disagree (3) | Agree (4) | Strongly agree (5) |
|-------------|-----------------------|--------------|--------------------------------|-----------|--------------------|
| Question    |                       |              |                                |           |                    |
| Codelist    |                       |              |                                |           |                    |
| Name        |                       |              |                                |           |                    |
| Data Type   |                       |              |                                |           |                    |
| Length      |                       |              |                                |           |                    |
| Description |                       |              |                                |           |                    |
| Alias       |                       |              |                                |           |                    |
| RangeChecks |                       |              |                                |           |                    |
| Good match  |                       |              |                                |           |                    |
| Relevancy   |                       |              |                                |           |                    |
