# Supplementary material for: Pragmatic MDR: a metadata repository with bottom-up standardization of medical metadata through reuse
Source: PubMed Central journal article supplement (PMC8130274; doi:10.1186/s12911-021-01524-8), 2021-05-17
Supplement: 12911_2021_1524_MOESM3_ESM.pdf [file 12911_2021_1524_MOESM3_ESM.pdf]

Additional file 3: Table with example requests and results for the REST API of the pragmatic MDR proof of concept application.

| Request                                | Results                                                                                                                                    |
|----------------------------------------|--------------------------------------------------------------------------------------------------------------------------------------------|
| /items/8946                            | Query the item resource with id 8946.                                                                                                      |
| /items?query=age                       | Find all items resources that contain "age" with the default sorting that combines the matching and number of occurrences of the resource. |
| /items?query=age&sort=occurrences,desc | Find items with "age" and sort descending by number of occurrences,                                                                        |
| /items?size=20&page=2                  | Request the third page with 20 results of all item resources.                                                                              |
| /items?query=name:age+AND+surg*        | Find items that contain the prefix "surg" and have a name with "age".                                                                      |
