# Supplementary material for: Pragmatic MDR: a metadata repository with bottom-up standardization of medical metadata through reuse
Source: PubMed Central journal article supplement (PMC8130274; doi:10.1186/s12911-021-01524-8), 2021-05-17

Additional file 5: Contingency table and heat map for rater agreement.

|         |    | Rater A |    |    |    |     |
|---------|----|---------|----|----|----|-----|
|         |    | SD      | D  | N  | A  | SA  |
| Rater B | SD | 0       | 1  | 2  | 3  | 0   |
|         | D  | 0       | 15 | 38 | 34 | 7   |
|         | N  | 0       | 6  | 20 | 27 | 2   |
|         | A  | 0       | 5  | 27 | 82 | 85  |
|         | SA | 0       | 0  | 2  | 19 | 101 |

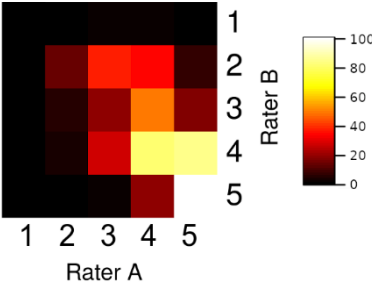

Supplement: 12911_2021_1524_MOESM5_ESM.pdf [file 12911_2021_1524_MOESM5_ESM.pdf]
